# Supplementary material
Source: PubMed Central journal article supplement (PMC5898235)
Supplement: NIHMS952971-supplement-Supplemental_Information.pdf [file NIHMS952971-supplement-Supplemental_Information.pdf]

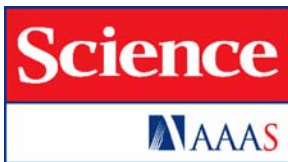

## Supporting Online Material for

### **Small CRISPR RNAs Guide Antiviral Defense in Prokaryotes**

Stan J. J. Brouns, Matthijs M. Jore, Magnus Lundgren, Edze R. Westra, Rik J. H. Slijkhuis, Ambrosius P. L. Snijders, Mark J. Dickman, Kira S. Makarova, Eugene V. Koonin, John van der Oost\*

\*To whom correspondence should be addressed. E-mail: john.vanderoost@wur.nl

Published 15 August 2008, *Science* **321**, 960 (2008)  
DOI: 10.1126/science.1159689

#### **This PDF file includes:**

Materials and Methods  
Figs. S1 to S4  
Tables S1 to S3  
References

## Materials and Methods

### Strains

*E. coli* K12 gene knockouts from the KEIO collection were kindly provided by the National BioResource Project (NBRP, NIG, Japan) (Table S2).

### Gene cloning, protein production and purification

The *cas* genes and CRISPRs were PCR amplified from *E. coli* K12 W3110 (BW25113) genomic DNA (genomic locus: 2885900-2876300 nt), and directionally cloned into a compatible expression vector set consisting of pET-52b (Amp<sup>R</sup>, 100 µg/ml), pCDF-1b (Str<sup>R</sup>, 50 µg/ml), pRSF-1b (Kan<sup>R</sup>, 50 µg/ml) and pACYCduet-1 (Cam<sup>R</sup>, 34 µg/ml) (Novagen), or pIH1119 (Amp<sup>R</sup>) (New England Biolabs) as indicated in Table S2 and S3. Primers for the *cas* genes were designed based on their predicted translation start sites according to their latest annotation (*SI*) (Table S2). Mutations were introduced using the QuikChange site-directed mutagenesis kit (Stratagene) (Table S2). Plasmids were transformed into *E. coli* BL21(DE3) (Novagen) which lacks endogenous *cas* genes, or *E. coli* DH5 $\alpha$  in the case of pIH1119. Protein production was induced with 0.1 mM isopropyl- $\beta$ -D-thiogalactopyranoside (IPTG) (Invitrogen) at an optical cell density at 600 nm of 0.6 for 16 h at 37 °C. Cells were harvested, resuspended in 20 mM Tris-HCl (pH 8.0) supplemented with 0.1 M NaCl, and disrupted using a French Pressure Cell. Tagged proteins were isolated using Strep-Tactin (IBA, Germany), HIS-Select (Sigma-Aldrich), or Amylose (New England Biolabs) affinity chromatography following manufacturer's

instructions. The identity of the proteins was determined by mass spectrometry, as described (S2).

### **Northern blotting**

Total RNA from 11 ml of exponentially grown *E. coli* cells was isolated using the *mirVana* miRNA isolation kit (Ambion). Strain *E. coli* BL21(DE3) containing various plasmid combinations (Table S3) was grown without IPTG induction, which resulted in low expression levels of the *cas* genes and CRISPR due to leakage of the expression system. Northern blots were performed by running 10 µg of RNA on a 9% polyacrylamide gels with 7 M urea in 0.5x TBE buffer (S3). The RNA was then transferred to a Genescreen Plus membrane (PerkinElmer) by semi-dry blotting using a Trans-blot SD (Bio-Rad). After 1 min of UV-crosslinking and baking (80 °C, 15 min), the membrane was hybridized with QuikHyb (Stratagene) at 42 °C. Blots were probed for 12 hours with a <sup>32</sup>P-5'-labelled DNA oligonucleotide of spacer 4 in the *E. coli* K12 CRISPR (oligonucleotide BG2349, Table S2). The blots were subsequently washed with 2x SSC buffer (S3) containing 0.1% SDS for 30 min, and 0.1x SSC buffer containing 0.1% SDS for 30 min. Blots were visualized using phosphorimaging with a Personal FX phosphorimager (Bio-Rad). RNA sizes were estimated by comparison with <sup>32</sup>P-labeled Decade RNA marker (Ambion).

### **Cleavage reactions**

Internally radiolabelled transcripts were generated by *in vitro* transcription using the MAXIscript T7 kit (Ambion) and  $\alpha$ -<sup>32</sup>P-UTP (GE) (Table S2). Templates for *in vitro* transcription were generated by PCR using primers BG2559 and BG2374 for the *E. coli* K12 CRISPR, BG2462 and BG2463 for *E. coli* UTI89, and BG2452 and BG2461 for the non-CRISPR. Full-length RNA substrates were gel-isolated from denaturing 2% agarose gels as described (S4). Cleavage reactions were set up at 37 °C in 20 mM Tris-HCl (pH 8.0) supplemented with 0.1 M NaCl and 1 mM EDTA. Protein samples (Table S3) were treated with 10 mM EDTA prior to the cleavage assay. Assays were started by adding 0.3  $\mu$ g of Cascade, or 0.1  $\mu$ g of MalE-CasE to a reaction containing 10 ng of gel-purified internally <sup>32</sup>P labeled transcripts in a total volume of 10  $\mu$ l. Samples were treated with 1 U of proteinase K for 5 min at 37 °C (Fluka) and acid-phenol extracted as described (S5). Reaction products were analyzed using 8% polyacrylamide gels containing 7 M urea.

### **RNA cloning**

Protein-bound total RNA was isolated from Strep-Tactin-purified Cascade (Table S3) using the *mirVana* miRNA isolation kit (Ambion). Approximately 6  $\mu$ g of RNA was denatured for 10 min at 65 °C, and subsequently 3' polyadenylated for 75 min at 41 °C using Poly(A) polymerase (Ambion) as described (S6). RNA products were separated from unincorporated nucleotides and enzymes using a NucAway gel filtration spin column (Ambion), and reverse transcribed with the Superscript III kit (Invitrogen) for 50 min at 50 °C with anchored primer BG2164 (5'-GCCCGCCCGGATCCTTTTTTTTTT-

TTTTTTTTTTTTTTTTTTTTTTTTTVN-3') (BamHI site in bold face) (S6). The RNA strand was degraded by RNase A (Fermentas) and RNase HI (Promega) for 15 min at 37 °C. Single-stranded cDNA was purified using the MinElute PCR purification kit (Qiagen). A 3' poly(dG) tail was added to the cDNA by 60 min incubation with Terminal Deoxynucleotidyl Transferase (Invitrogen) at 37 °C, followed by purification using MinElute reaction cleanup kit (Qiagen). The single stranded cDNA was used as a template in a PCR using Native Pfu polymerase (Stratagene) and primers BG2220 (5'-GCGCCCGCGGATCCCCCCCCCDN-3') and BG2222 (5'-GCCCCGCCCGGATCCTT-3'). The PCR products were cloned into vector pUC29 and transformed into *E. coli* NEB5 $\alpha$  (New England Biolabs).

### **Phage studies**

Host sensitivity to phages was tested using a virulent variant of phage Lambda ( $\lambda_{vir}$ ) (S7) obtained from Centraalbureau voor Schimmelcultures (Utrecht, Netherlands) and *E. coli* BL21-AI (Invitrogen) as a host (Table S2 and S3). Strains were grown in 2YT-Lambda (2YTL) media (16 g/L tryptone, 10 g/L yeast extract, 5 g/L NaCl, 10 mM MgSO<sub>4</sub>, 0.2 % maltose) until the optical density (OD<sub>600 nm</sub>) reached 0.3. Cas protein and pre-crRNA production was then induced for 30 min by adding a final concentration of 0.2 % L-arabinose (Sigma-Aldrich) and 0.1 mM IPTG. Cells were spun down and resuspended in 10 mM MgSO<sub>4</sub>, before being used in plaque assays according to standard procedures (S3). Plaque assays were performed in triplicate. Plates and top-agar contained 2YTL and above mentioned concentrations of inducers. The sensitivity of the host to phage

infection was calculated as the efficiency of plaquing (S8), which is the plaque count ratio of a strain containing an anti- $\lambda_{\text{vir}}$  CRISPR to that of a strain containing a CRISPR with non-targeting spacers (N). Error-bars were calculated as one standard deviation. Anti- $\lambda$  CRISPRs were designed by randomly picking proto-spacer sequences in four genes of the  $\lambda$  genome (Fig.S3). The artificial anti- $\lambda$  CRISPR design did not take any *S. thermophilus* CRISPR motifs into account (S9, S10). The motifs are conserved nucleotide sequences located downstream of proto-spacers on the virus genome, which are important for the phage resistant phenotype in *S. thermophilus*. No CRISPR motif could be identified for the *E. coli* K12 CRISPR/*cas* system using the flanking regions of the four known proto-spacers in phage P1 and plasmid F (S11). The anti- $\lambda$  CRISPRs were synthesized by Genart AG (Regensburg, Germany), and subcloned into vector pACYCduet-1 vector (Novagen) (C<sub>1-4</sub>, T<sub>1-4</sub>, Table S2) using restriction sites NcoI and Acc65I. CRISPRs with single targeting spacers (C<sub>1</sub>, C<sub>2</sub>, C<sub>3</sub>, C<sub>4</sub>, T<sub>1</sub>, T<sub>2</sub>, T<sub>3</sub>, T<sub>4</sub>) were obtained by exchange of single non-targeting spacers of the N CRISPR with the corresponding single targeting spacers of C<sub>1-4</sub> and T<sub>1-4</sub> CRISPRs using restriction enzyme pairs NcoI and EcoRI, EcoRI and BamHI, BamHI and NsiI, NsiI and Acc65I (Fig.S3). The CRISPR sequences are provided in Figure S4.

Figure S1

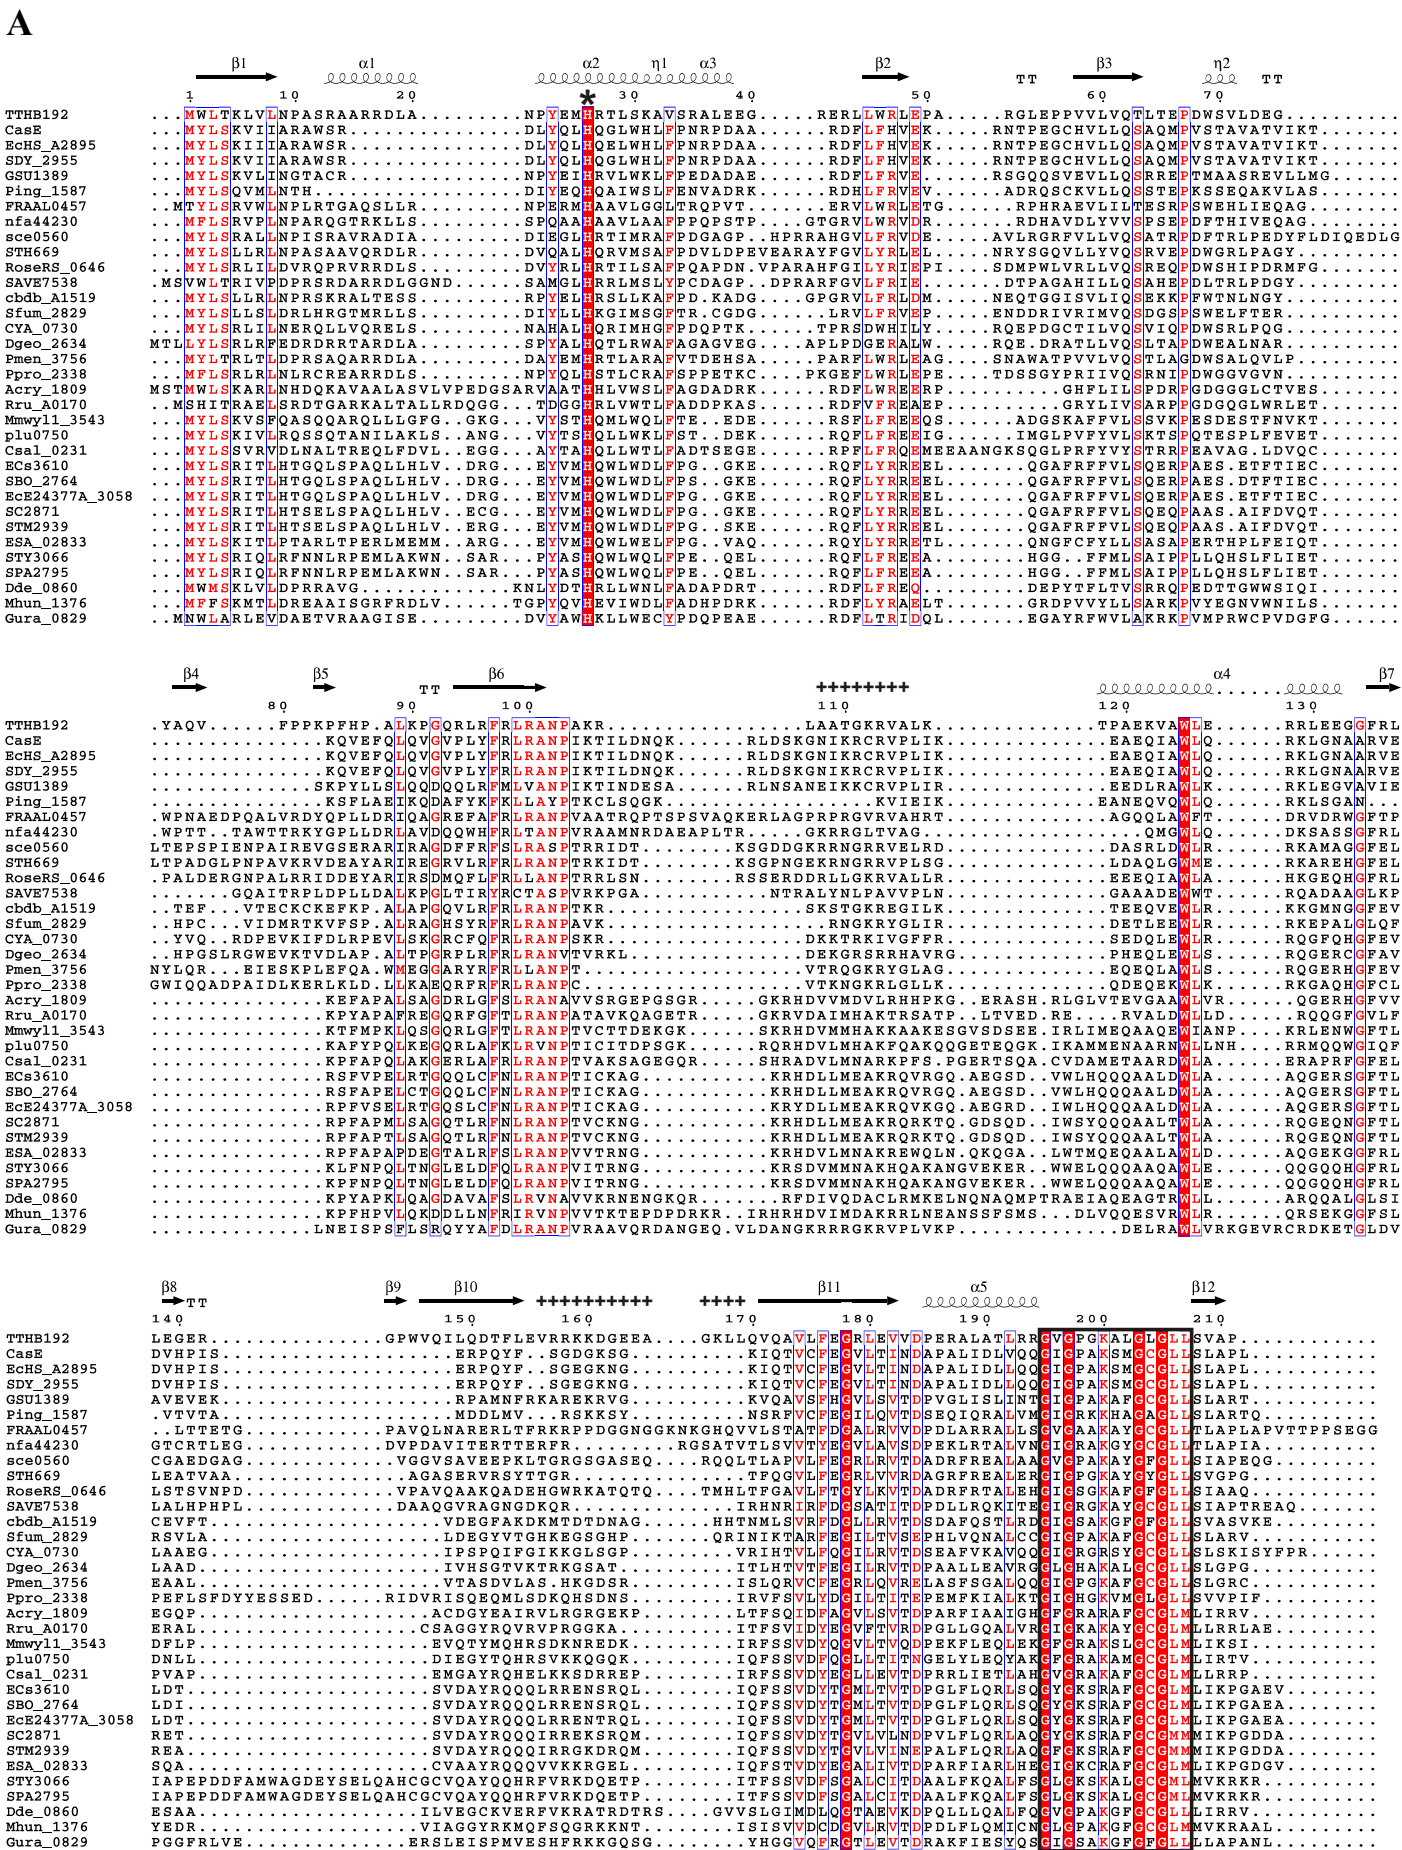

**B**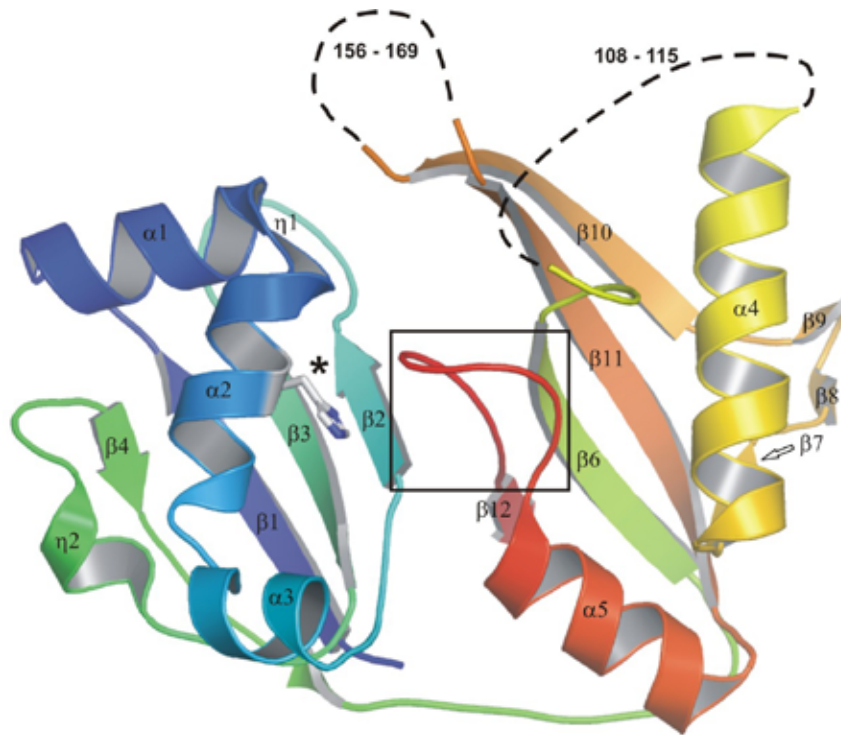**Figure S1**

**A.** Multiple sequence alignment of CasE homologs. Sequences were aligned with TCoffee (S12) and aligned to the structure of TTHB192 (PDB ID: 1WJ9) (S13) using ESPrict (S14). TTHB192, *Thermus thermophilus* HB8; CasE, *Escherichia coli* K12 W3110; EcHS\_A2895, *E. coli* HS; SDY\_2955, *Shigella dysenteriae* Sd197; GSU1389, *Geobacter sulfurreducens* PCA; Ping\_1587, *Psychromonas ingrahamii* 37; FRAAL0457, *Frankia alni* ACN14a; nfa44230, *Nocardia farcinica* IFM 10152; sce0560, *Sorangium cellulosum* ‘So ce 56’; STH669, *Symbiobacterium thermophilum* IAM 14863; RoseRS\_0646, *Roseiflexus* sp. RS-1; SAVE7538, *Streptomyces avermitilis* MA-4680; cbdb\_A1519, *Dehalococcoides* sp. CBDB1; Sfum\_2829, *Syntrophobacter fumaroxidans* MPOB; CYA\_0730, *Synechococcus* sp. JA-3-3Ab; Dgeo\_2534, *Deinococcus geothermalis* DSM 11300; Pmen\_3756, *Pseudomonas mendocina* ymp; Ppro\_2338, *Pelobacter propionicus* DSM 2379; Acry\_1809, *Acidiphilium cryptum* JF-5; Rru\_A0170, *Rhodospirillum rubrum* ATCC 11170; Mmwy11\_3543, *Marinomonas* sp. MWYL1; plu0750, *Photobacterium luminescens* subsp. laumondii TT01; Csal\_0231, *Chromohalobacter salexigens* DSM 3043; Ecs3610, *E. coli* 0157:H7 str. Sakai; SBO\_2764, *Shigella boydii* Sb227; EcE24377A\_3058, *E. coli* E24377A; SC2871, *Salmonella enterica* subsp. Enterica serovar Choleraesuis str. SC-B67; STM2939, *Salmonella typhimurium* LT2; ESA\_02833, *Enterobacter sakazakii* ATCC BAA-894; STY3066, *S. enterica* subsp. Enterica serovar Typhi str. CT18; SPA2795, *S. enterica* subsp. Enterica serovar Paratyphi A str. ATCC9150; Dde\_0860, *Desulfovivrio desulfuricans* G20; Mhun\_1376, *Methanospirillum hungatei* JF-1; Gura\_0829, *Geobacter uraniireducens* Rf4. Secondary structural elements and amino acid numbering follows the TTHB192 structure and sequence. Disordered loops are indicated with a plus (+), and the highly conserved residue His26 is marked with an asterisk (\*). The highly conserved C-terminal glycine-rich loop, which is the hallmark of this protein family, is highlighted with a box.

**B.** Ribbon diagram of the structure of TTHB192, a CasE homolog from *Thermus thermophilus* HB8 (PDB ID: 1WJ9) (S13). Structural features are indicated as in A. Structurally disordered residues 108 to 115 and 156 to 169 are depicted by dashed lines. Note that the highly conserved glycine-rich loop between secondary structure elements  $\alpha 5$  and  $\beta 12$  is spatially close to His26.



## Figure S2

Sequences of Cascade-bound RNA.

>RNA1-SP6

ATAAACCGTCAGCTTTATAAATCCGGAGATACGGAACTAGAGTTCCCCG

>RNA2\_D-TAGATOSE-1,6-DISPHOSPHATE ALDOLASE GATY

TTGTACGTGGTATCGACAAAGCAGATGCTGAACAACGCACAGCGCGGCGGTTATG

>RNA3-SP3

ATAAACCGGGCTCCCTGTCGGTTGTAATTGATAATGTTGAGAGTTCCCCG

>RNA4-SP3

ATAAACCGGGCTCCCTGTCGGTTGTAATTGATAATGTTGAGAGTTCCCC

>RNA5-SP2

ATAAACCGCAGCCGAAGCCAAAGGTGATGCCGAACACGCTGAGTTCCCCG

>RNA6-SP5

ATAAACCGCGAATCGCGCATAACCCTGCGCGTCGCCGCCTGCGAGTTCCCCG

>RNA7-SP8

ATAAACCGCTGCTGGAGCTGGCTGCAAGGT

>RNA8-SP3

ATAAACCGGGCTCCCTGTCGGTTGTAATTGATAATGTTGAGAGTTCCCCGCGCCAGCG

>RNA9-SP3

ATAAACCGGGCTCCCTGTCGGTTGTAATTGATAATGTTGAGAGTTCCCCG

>RNA10-SP8

ATAAACCGCTGCTGGAGCTGGCTGCAAG

>RNA11-SP2

ATAAACCGCAGCCGAAGCCAAAGGTGATGCCGAACACGCTGAGTTCCCCG

>RNA12-SP8

ATAAACCGCTGCTGGAGCTGGCTG

>RNA13-K12-2876563-2876522, INTERGENIC

ATAAGGAAATGTTACATTAAGGTTGGTGGGTTGTTTTTATGG

>RNA14-SP1 EN 2

ATAAACCGCTTTTCGCAGACGCGCGGCGATACGCTCACGCAGAGTTCCCCGCGCCAGCGGGGA

TAAACCGCAGCCGAAGCCAAAGGTGATGCCGAACACGCTGAGTTCCCCG

>RNA15-16S

AAAACCTGGAGGAAGGTGGGGATGACGTCAAGTCATCATG

>RNA16-SP4

ATAAACCGTTTTGGATCGGGTCTGGAATTTCTGAGCGGTCGCGAGTTCCCCGCGCCAGC

>RNA17-SP2

CCGAAGCCAAAGGTGATGCCGAACACGCTGAGTTCCCCG

>RNA18-SP4

ATAAACCGTTTTGGATCGGGTCTGGAATTTCTGAGCGGTCGCGAGTTCCCC

>RNA19-23S

TCGCGGATGGAGCTGG

>RNA20-SP2

ATAAACCGCAGCCGAAGCCAAAGGTGATGCCGAACACGCTGAGTTCCCTG

>RNA21-SP8

ATAAACCGCTGCTGGAGCTGGCTGC

>RNA22-16S

AAATTGAAGAGTTTGGATCATGGCTCAGATTGAACGCTGGCGGCAGGCCTAACACATGCAAGT  
CGAACGGTAACAG

>RNA23-SP4

ATAAACCGTTTTGGATCGGGTCTGGAATTTCTGAGCGGTCGCGAGTTCCCCGCGCCAGCGG

>RNA24-INTERGENIC K12 2876539-2876477

GGTGGGTTGTTTTTATGGGAAAAAATGCTTTAAGAACAAATGTATACTTTTAGAGAGTTCCC  
C

>RNA25-SP2

AGCGGGGATAAACCGCAGCCGAAGCCAAAGGTGATGCCGAACACGCTGAGTTCCCCGCGCCA  
GCGG

>RNA26-LEADER-REPEAT ONE

TGGTGGGTTGTTTTTATGGGAAAAAATGCTTTAAGAACAAATGTATACTTTTAGAGAGTTCC  
CCGT

>RNA27-YGCL

TATCGTAATAATCAAGCATCTATTCTTGAACGGCGTCATGATGTGTTGATGT

>RNA28-YGCL

ACATCAACACATCATGACGCCGTTCAAGAATAGATGCTTGATTATTACGATA

>RNA29-INTERGENIC-K12-2876396-2876357

GCAGCCGAAGCCAAAGGTGATGCCGAACACGCTGAGTTCC

>RNA30-PROQ PUTATIVE SOLUTE/DNA COMPETENCE EFFECTOR

AATAGCAGTAAAGAAGTAATCGCGTTTCTGGCCGAACGTTTTCCCCACTGTTTCAGTGCGGA  
AGGTGAAGCGCGTCCGCTG

>RNA31-SP2

ATAAACCGCAGCCGAAGCCAAAGGTGATGCCGAACACGCTGAGTTCCCCG

>RNA32-SP1

ATAAACCGCTTTTCGCAGACGCGCGGCGATACGCTCACGCAGAGTTCC

>RNA33-SP8

ATAAACCGCTGCTGGAGCTGGCTGCAAGG

>RNA34-SP4

ATAAACCGTTTTGGATCGGTTTTGGAATTTTTGATCGTTTTCCGAGTTCCCCG

>RNA35-SP5

ATAAACCGCGAATCGCGCATAACCCTGCGCGTCGCCGCCTGCGAGTTCCCCGCGC

>RNA36-SP7

GATAAACCGGACTCACCCCGAAAGAGATTGCCAGCCAGCTTGAGTT

>RNA37-SP8

ATAAACCGCTGCTGGAGCTGGCTGCAAGGCAAGC

>RNA38-16S

ACGACCAGGGCTACACACGTGCTACAATGGCGCATACAAAGAGAAGCGACCTCGCGAGAGCA  
AGCGGACCTCATAAAGTGCCTCGTAGTCCGGATTGGAGTCTGCAACTCGACTCCATGAAGTC  
GGAATCGCTAGTAATCGTGGATCAGAATGCCACGGTGAATACGT

>RNA39-23S

AACTTCGGGAGAAGGCACGCTGATATGTAGGT

>RNA40-SP1

ATAAACCGCTTTTCGCAGACGCGCGGCGATACGCTCACGCAGAGTTCC

>RNA41-SP4

ATAAACCGTTTTGGATCGGGTCTGGAATTTCTGAGCGGTTCGCGAGTTC

>RNA42-SP4

ATAAACCGTTTTGGATCGGGTCTGGAATTTCTGAGC

>RNA43-SP4

ATAAACCGTTTTGGATCGGGTCTGGAATTTCTGAGCGGTTCGCGAGTTCCCCG

>RNA44-LACI

TTCTCCCATGAAGACGGTACGCGACTGGGCGTGGAGCAC

>RNA45-SP2

ATAAACCGCAGCCGAAGCCAAAGGTGATGCCGAACACGCTGAGTTCCCCG

>RNA46-SP5

ATAAACCGGGAATCGCGCATAACCCTGCGCGTCGCCGCCTGCGAGTTCCCCG

>RNA47-SP4

ATAAACCGTTTTGGATCGGGTCTGGAATTTCTGAGCGGTTCGCGAGTTCCCCG

>RNA48-SP1  
ATAAACCGCTTTTCGCAGACGCGCGGCGATACGCTCACGCAGAGTTCCCC

>RNA49-SP5  
ATAAACCGCGAATCGCGCATACCCTGCGCGTCGCCGCCTGCGAGTTCCCCG

>RNA50-SP8  
ATAAACCGCTGCTGGAGCTGGCTGCAAGG

>RNA51-SP2  
ATAAACCGCAGCCGAAGCCAAAGGTGATGCCGAACACGCTGAGTTCCCCG

>RNA52-SP7  
ATAAACCGGACTCACCCCGAAAGAGATTGCCAGCCAGCTTGAGTTCCC

>RNA53-SP2  
TAAACCGCAGCGGAAGCCAAAGGTGATGCGGAACACGCTGAGTTCCC

>RNA54-SP4  
ATAAACCGTTGGGATCGGTTCTGGAATTTTTGAGCGGTCGGGAGTTCCCC

>RNA55-SP2  
ATAAACCGCAGCGGAAGCCAAAGGTGATGCCGAACACGTTTCGAGTTCCCC

>RNA56-THR tRNA  
GTAATGCGAAGGTCGTAGGTTCTGACTCC

>RNA57-SP4  
ATAAACCGTTTTGGATCGGGTCTGGAATTTCTGAGCGGTCGCGAGTTCCCCGCGCCAGCG

>RNA58-SP4  
ATAAACCGTTTTGGATCGGGTCTGGAATTTCTGAGCGGTCGCGAGTTCCCCG

>RNA59-YGBF  
TGTATCCGCAAAAATTCGTGAAATGATCTGGGAACAAATAGCTGGACTGGCGGAAGGGGGC

>RNA60-SP8  
AAACCGCTGCTGGAGCTGGCT

>RNA61-23S  
TCAAGGTTGAGGCGTGATG

>RNA62-SP8  
ATAAACCGCTGCTGGAGCTGGCTGCAAGGCAAGCCGCC

>RNA63-SP7  
ATAAACCGGACTCACCCCGAAAGAGATTGCCAGCCAGCTTGAGTTC

>RNA64-SP4  
ATAAACCGTTTTGGATCGGTTCTGGAATTTTTGAGCGGTCGGGAGTTCCCCGCGC

>RNA65-YGCH  
ATCTTGTACAGCAAGGTATTGGGCCAGCTAAATCGATGGGATGTGGCTTGGTATCTTT

>RNA66-SP1  
ATAAACCGCTTTTCGCAGACGCGCGGCGATACGCTCACGCAGAGTTCCCCG

>RNA67-SP8  
ATAAACCGCTGCTGGAGCTGGCTGCAAG

>RNA68-SP8  
ATAAACCGCTGCTGGAGCTGGCTGCAAG

>RNA69-SP4  
GTCTGGAATTTTTGAGCGGTCGCGAGTTCCCCG

>RNA70-LEADER  
ATAAGGAAATGTTACATTAAGGTTGGTGGGTTGTTTTATGGGAAAAAATGCTTTAAGAAC

>RNA71-SP8  
ATAAACCGCTGCTGGAGCTGGCTG

>RNA72-SP3  
ATGTTGAGAGTTCCCC

>RNA73-SP4  
ATAAACCGTTTTGGATCGGGTCTGGAATTTCTGAGCGGTCGCAAGTTCCCCG

>RNA74-SP3  
GGGCTCCCTGTCGGTTGTAATTGATAATGTTGAGAGTTCCCCGCGCC

>RNA75-SP2  
ATAAACCGCAGCCGAAGCCAAAGGTGATGCCGAACACGCTGAGTTCCCC

>RNA76-SP4  
ATAAACCGTTTTGGATCGGTTCTGGAATTTTTGAGCGGTCGCGAGTTCCCC

>RNA77-SP2  
ATAAACCGCAGCGGAAGCCAAAGGTGATGCCGAACACGCTGAGTTCCCC

>RNA78-SP1  
ATAAACCGCTTTTCGCAGACGCGCGGCGATACGCTCACGCAGAGTTCCCC

>RNA79-SP4  
ATAAACCGTTTTGGATCGGGTCTGGAATTTTCAGAGCGGTCGCGAGTTCCCCGCG

**Figure S3**

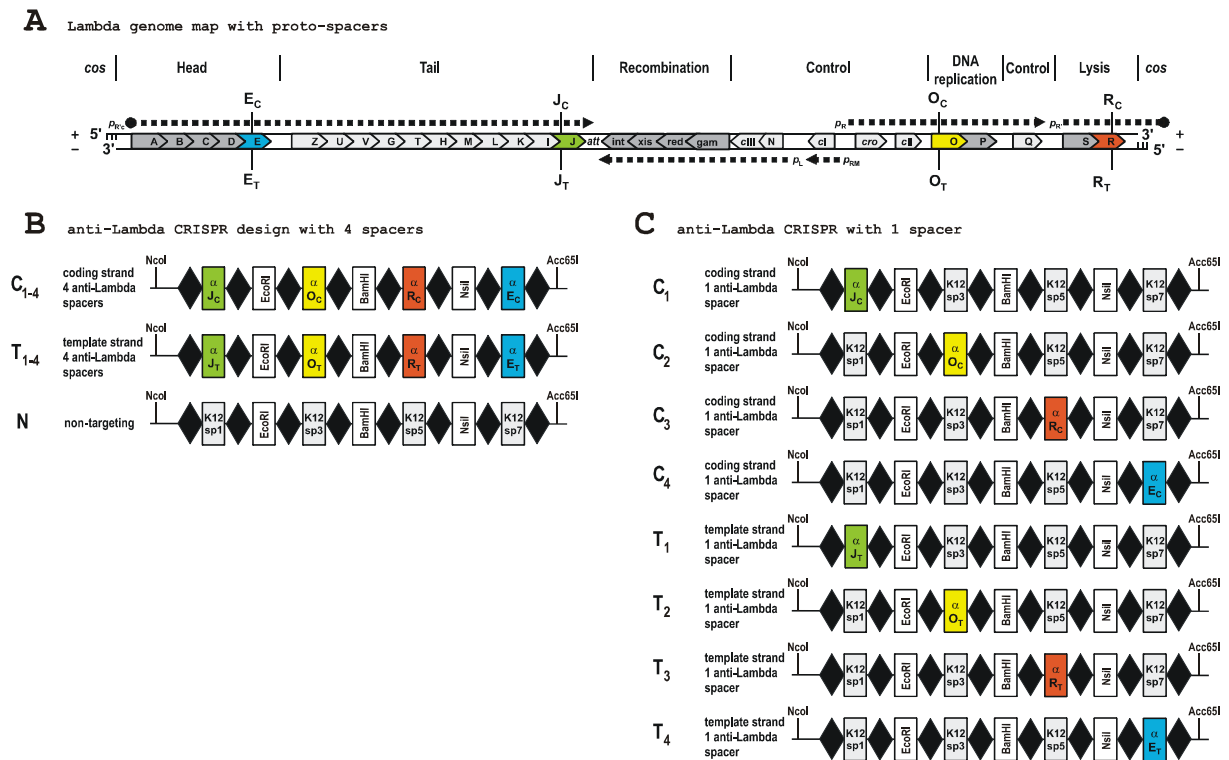

**A** Phage  $\lambda$  genome map indicating the main genes and transcripts (dotted arrows), and the positions of the proto-spacers on the coding or template strand. **B** Design of two anti- $\lambda$  CRISPRs (repeats: diamonds, spacers: rectangles) producing crRNAs complementary to (indicated by  $\alpha$ ) either the coding strand ( $C_{1-4}$ ) of the four genes J, O, R and E (*i.e.* mRNA and plus strand of the viral genome), or the template strand ( $T_{1-4}$ ) of these four genes (*i.e.* minus strand). A third CRISPR (N) was designed as a non-targeting control containing the naturally occurring spacers 1, 3, 5, and 7 from *E. coli* K12, which have no homology to any known phage. The number of plaque forming units obtained in the presence of this CRISPR was used to calculate the efficiency of plaquing (Fig.4). Restriction sites were introduced in spacer 2, 4 and 6 (EcoRI, BamHI and NsiI, respectively). **C** CRISPRs with single targeting spacers ( $C_1$ ,  $C_2$ ,  $C_3$ ,  $C_4$ ,  $T_1$ ,  $T_2$ ,  $T_3$ ,  $T_4$ ) were obtained by exchange of single non-targeting spacers of the N CRISPR with the corresponding single targeting spacers of  $C_{1-4}$  and  $T_{1-4}$  CRISPRs using restriction enzyme pairs NcoI and EcoRI, EcoRI and BamHI, BamHI and NsiI, NsiI and Acc65I.

## Figure S4

### Sequences of the CRISPRs used in this study

#### *Coding CRISPR (C<sub>1-4</sub>), pWUR479*

GGCGCGCCATGGAAACAAAGAATTAGCTGATCTTTAATAATAAGGAAATGTTACATTAAGGTTGGTGGGTTGTTT  
TTATGGGAAAAAATGCTTTAAGAACAAATGTATACTTTTAGAGAGTTCCCCGCGCCAGCGGGGATAAACCGGGCC  
CTTCGCTGATGGCATCGATCACACTCAGGAGTTCCCCGCGCCAGCGGGGATAAACCGCAGCCGAAGCCAAAGAAT  
TCGCCGAACACGCTGAGTTCCCCGCGCCAGCGGGGATAAACCGGTTTGGCTGGCTGTCACGCCTGCCTGTTGCTTG  
GAGTTCCCCGCGCCAGCGGGGATAAACCGGTTTGGATCGGGTCTGGATCCTCTGAGCGGTTCGGAGTTCCCCGCGCC  
AGCGGGGATAAACCGTTTCAGGCCAAGCTGCTTGCAGTAGGCATCCCAGAGTTCCCCGCGCCAGCGGGGATAAACCC  
GTCAGCTTTATAAATATGCATATACGAAACTAGAGTTCCCCGCGCCAGCGGGGATAAACCGTATCGTCCGTCGG  
GTCATACGTGGACTTGTGAGAGTTCCCCGCGCCAGCGGGGATAAACCGCAGCTCCCATTTTCAAACCCATCAAGA  
CGCGGTACCTTAATTAA

#### *Template CRISPR (T<sub>1-4</sub>), pWUR478*

GGCGCGCCATGGAAACAAAGAATTAGCTGATCTTTAATAATAAGGAAATGTTACATTAAGGTTGGTGGGTTGTTT  
TTATGGGAAAAAATGCTTTAAGAACAAATGTATACTTTTAGAGAGTTCCCCGCGCCAGCGGGGATAAACCGCTGA  
GTGTGATCGATGCCATCAGCGAAGGGCCGAGTTCCCCGCGCCAGCGGGGATAAACCGCAGCCGAAGCCAAAGAAT  
TCGCCGAACACGCTGAGTTCCCCGCGCCAGCGGGGATAAACCGCAAGCAACAGGCAGGCGTGACAGCCAGCAAAC  
GAGTTCCCCGCGCCAGCGGGGATAAACCGTTTGGATCGGGTCTGGATCCTCTGAGCGGTTCGGAGTTCCCCGCGCC  
AGCGGGGATAAACCGTGGGATGCCTACCGCAAGCAGCTTGGCCTGAAGAGTTCCCCGCGCCAGCGGGGATAAACCC  
GTCAGCTTTATAAATATGCATATACGAAACTAGAGTTCCCCGCGCCAGCGGGGATAAACCGTGACAAGTCCACG  
TATGACCCGACCGACGATAGAGTTCCCCGCGCCAGCGGGGATAAACCGCAGCTCCCATTTTCAAACCCATCAAGA  
CGCGGTACCTTAATTAA

#### *Non-targeting CRISPR (N), pWUR477*

GGCGCGCCATGGAAACAAAGAATTAGCTGATCTTTAATAATAAGGAAATGTTACATTAAGGTTGGTGGGTTGTTT  
TTATGGGAAAAAATGCTTTAAGAACAAATGTATACTTTTAGAGAGTTCCCCGCGCCAGCGGGGATAAACCGCTTT  
CGCAGACGCGCGCGGATACGCTCACGCAGAGTTCCCCGCGCCAGCGGGGATAAACCGCAGCCGAAGCCAAAGAAT  
TCGCCGAACACGCTGAGTTCCCCGCGCCAGCGGGGATAAACCGGGTCCCTGTGCGGTTGTAATTGATAATGTTGA  
GAGTTCCCCGCGCCAGCGGGGATAAACCGTTTGGATCGGGTCTGGATCCTCTGAGCGGTTCGGAGTTCCCCGCGCC  
AGCGGGGATAAACCGCAATCGCGCATAACCCTGCGCGTTCGCCGCTGGAGTTCCCCGCGCCAGCGGGGATAAACCC  
GTCAGCTTTATAAATATGCATATACGAAACTAGAGTTCCCCGCGCCAGCGGGGATAAACCGGACTCACCCCGAA  
AGAGATTGCCAGCCAGCTTGAGTTCCCCGCGCCAGCGGGGATAAACCGCAGCTCCCATTTTCAAACCCATCAAGA  
CGCGGTACCTTAATTAA

#### *Coding CRISPR (C<sub>1</sub>), pWUR491*

GGCGCGCCATGGAAACAAAGAATTAGCTGATCTTTAATAATAAGGAAATGTTACATTAAGGTTGGTGGGTTGTTT  
TTATGGGAAAAAATGCTTTAAGAACAAATGTATACTTTTAGAGAGTTCCCCGCGCCAGCGGGGATAAACCGGGCC  
CTTCGCTGATGGCATCGATCACACTCAGGAGTTCCCCGCGCCAGCGGGGATAAACCGCAGCCGAAGCCAAAGAAT  
TCGCCGAACACGCTGAGTTCCCCGCGCCAGCGGGGATAAACCGGTTTGGCTGGCTGTCACGCCTGCCTGTTGCTTG  
GAGTTCCCCGCGCCAGCGGGGATAAACCGGTTTGGATCGGGTCTGGATCCTCTGAGCGGTTCGGAGTTCCCCGCGCC  
AGCGGGGATAAACCGCAATCGCGCATAACCCTGCGCGTTCGCCGCTGGAGTTCCCCGCGCCAGCGGGGATAAACCC  
GTCAGCTTTATAAATATGCATATACGAAACTAGAGTTCCCCGCGCCAGCGGGGATAAACCGGACTCACCCCGAA  
AGAGATTGCCAGCCAGCTTGAGTTCCCCGCGCCAGCGGGGATAAACCGCAGCTCCCATTTTCAAACCCATCAAGA  
CGCGGTACCTTAATTAA

#### *Coding CRISPR (C<sub>2</sub>), pWUR492*

GGCGCGCCATGGAAACAAAGAATTAGCTGATCTTTAATAATAAGGAAATGTTACATTAAGGTTGGTGGGTTGTTT  
TTATGGGAAAAAATGCTTTAAGAACAAATGTATACTTTTAGAGAGTTCCCCGCGCCAGCGGGGATAAACCGCTTT  
CGCAGACGCGCGCGGATACGCTCACGCAGAGTTCCCCGCGCCAGCGGGGATAAACCGCAGCCGAAGCCAAAGAAT  
TCGCCGAACACGCTGAGTTCCCCGCGCCAGCGGGGATAAACCGGTTTGGCTGGCTGTCACGCCTGCCTGTTGCTTG  
GAGTTCCCCGCGCCAGCGGGGATAAACCGGTTTGGATCGGGTCTGGATCCTCTGAGCGGTTCGGAGTTCCCCGCGCC  
AGCGGGGATAAACCGCAATCGCGCATAACCCTGCGCGTTCGCCGCTGGAGTTCCCCGCGCCAGCGGGGATAAACCC  
GTCAGCTTTATAAATATGCATATACGAAACTAGAGTTCCCCGCGCCAGCGGGGATAAACCGGACTCACCCCGAA  
AGAGATTGCCAGCCAGCTTGAGTTCCCCGCGCCAGCGGGGATAAACCGCAGCTCCCATTTTCAAACCCATCAAGA  
CGCGGTACCTTAATTAA

*Coding CRISPR (C<sub>3</sub>), pWUR493*

GGCGCGCCATGGAAACAAAGAATTAGCTGATCTTTAATAATAAGGAAATGTTACATTAAGGTTGGTGGGTTGTTT  
TTATGGGAAAAAATGCTTTAAGAACAAATGTATACTTTTAGAGAGTTCCCCGCGCCAGCGGGGATAAACCGCTTT  
CGCAGACGCGCGGCGATACGCTCACGCAGAGTTCCCCGCGCCAGCGGGGATAAACCGCAGCCGAAGCCAAAGAAT  
TCGCCGAACACGCTGAGTTCCCCGCGCCAGCGGGGATAAACCGGGCTCCCTGTGCGGTTGTAATTGATAATGTTGA  
GAGTTCCCCGCGCCAGCGGGGATAAACCGTTTTGGATCGGGTCTGGATCCTCTGAGCGGTTCGGAGTTCCCCGCGCC  
AGCGGGGATAAACCGTTTCAGGCCAAGCTGCTTGCGGTAGGCATCCCAGAGTTCCCCGCGCCAGCGGGGATAAACCC  
GTCAGCTTTATAAATATGCATATACGGAAACTAGAGTTCCCCGCGCCAGCGGGGATAAACCGGACTCACCCCGAA  
AGAGATTGCCAGCCAGCTTGAGTTCCCCGCGCCAGCGGGGATAAACCGCAGCTCCCATTTTCAAACCCATCAAGA  
CGCGGTACCTTAATTA

*Coding CRISPR (C<sub>4</sub>), pWUR494*

GGCGCGCCATGGAAACAAAGAATTAGCTGATCTTTAATAATAAGGAAATGTTACATTAAGGTTGGTGGGTTGTTT  
TTATGGGAAAAAATGCTTTAAGAACAAATGTATACTTTTAGAGAGTTCCCCGCGCCAGCGGGGATAAACCGCTTT  
CGCAGACGCGCGGCGATACGCTCACGCAGAGTTCCCCGCGCCAGCGGGGATAAACCGCAGCCGAAGCCAAAGAAT  
TCGCCGAACACGCTGAGTTCCCCGCGCCAGCGGGGATAAACCGGGCTCCCTGTGCGGTTGTAATTGATAATGTTGA  
GAGTTCCCCGCGCCAGCGGGGATAAACCGTTTTGGATCGGGTCTGGATCCTCTGAGCGGTTCGGAGTTCCCCGCGCC  
AGCGGGGATAAACCGCGAATCGCGCATACCCTGCGCGTTCGCCCTGGAGTTCCCCGCGCCAGCGGGGATAAACCC  
GTCAGCTTTATAAATATGCATATACGGAAACTAGAGTTCCCCGCGCCAGCGGGGATAAACCGTATCGTTCGGTTCGG  
GTCATACGTGGACTTGTTCAGAGTTCCCCGCGCCAGCGGGGATAAACCGCAGCTCCCATTTTCAAACCCATCAAGA  
CGCGGTACCTTAATTA

*Template CRISPR (T<sub>1</sub>), pWUR487*

GGCGCGCCATGGAAACAAAGAATTAGCTGATCTTTAATAATAAGGAAATGTTACATTAAGGTTGGTGGGTTGTTT  
TTATGGGAAAAAATGCTTTAAGAACAAATGTATACTTTTAGAGAGTTCCCCGCGCCAGCGGGGATAAACCGCTGA  
GTGTGATCGATGCCATCAGCGAAGGGCCGAGTTCCCCGCGCCAGCGGGGATAAACCGCAGCCGAAGCCAAAGAAT  
TCGCCGAACACGCTGAGTTCCCCGCGCCAGCGGGGATAAACCGGGCTCCCTGTGCGGTTGTAATTGATAATGTTGA  
GAGTTCCCCGCGCCAGCGGGGATAAACCGTTTTGGATCGGGTCTGGATCCTCTGAGCGGTTCGGAGTTCCCCGCGCC  
AGCGGGGATAAACCGCGAATCGCGCATACCCTGCGCGTTCGCCCTGGAGTTCCCCGCGCCAGCGGGGATAAACCC  
GTCAGCTTTATAAATATGCATATACGGAAACTAGAGTTCCCCGCGCCAGCGGGGATAAACCGGACTCACCCCGAA  
AGAGATTGCCAGCCAGCTTGAGTTCCCCGCGCCAGCGGGGATAAACCGCAGCTCCCATTTTCAAACCCATCAAGA  
CGCGGTACCTTAATTA

*Template CRISPR (T<sub>2</sub>), pWUR488*

GGCGCGCCATGGAAACAAAGAATTAGCTGATCTTTAATAATAAGGAAATGTTACATTAAGGTTGGTGGGTTGTTT  
TTATGGGAAAAAATGCTTTAAGAACAAATGTATACTTTTAGAGAGTTCCCCGCGCCAGCGGGGATAAACCGCTTT  
CGCAGACGCGCGGCGATACGCTCACGCAGAGTTCCCCGCGCCAGCGGGGATAAACCGCAGCCGAAGCCAAAGAAT  
TCGCCGAACACGCTGAGTTCCCCGCGCCAGCGGGGATAAACCGCAAGCAACAGGCAGGCGTGACAGCCAGCAAAC  
GAGTTCCCCGCGCCAGCGGGGATAAACCGTTTTGGATCGGGTCTGGATCCTCTGAGCGGTTCGGAGTTCCCCGCGCC  
AGCGGGGATAAACCGCGAATCGCGCATACCCTGCGCGTTCGCCCTGGAGTTCCCCGCGCCAGCGGGGATAAACCC  
GTCAGCTTTATAAATATGCATATACGGAAACTAGAGTTCCCCGCGCCAGCGGGGATAAACCGGACTCACCCCGAA  
AGAGATTGCCAGCCAGCTTGAGTTCCCCGCGCCAGCGGGGATAAACCGCAGCTCCCATTTTCAAACCCATCAAGA  
CGCGGTACCTTAATTA

*Template CRISPR (T<sub>3</sub>), pWUR489*

GGCGCGCCATGGAAACAAAGAATTAGCTGATCTTTAATAATAAGGAAATGTTACATTAAGGTTGGTGGGTTGTTT  
TTATGGGAAAAAATGCTTTAAGAACAAATGTATACTTTTAGAGAGTTCCCCGCGCCAGCGGGGATAAACCGCTTT  
CGCAGACGCGCGGCGATACGCTCACGCAGAGTTCCCCGCGCCAGCGGGGATAAACCGCAGCCGAAGCCAAAGAAT  
TCGCCGAACACGCTGAGTTCCCCGCGCCAGCGGGGATAAACCGGGCTCCCTGTGCGGTTGTAATTGATAATGTTGA  
GAGTTCCCCGCGCCAGCGGGGATAAACCGTTTTGGATCGGGTCTGGATCCTCTGAGCGGTTCGGAGTTCCCCGCGCC  
AGCGGGGATAAACCGTGGGATGCCTACCAGCAAGCAGCTTGGCCTGAAGAGTTCCCCGCGCCAGCGGGGATAAACCC  
GTCAGCTTTATAAATATGCATATACGGAAACTAGAGTTCCCCGCGCCAGCGGGGATAAACCGGACTCACCCCGAA  
AGAGATTGCCAGCCAGCTTGAGTTCCCCGCGCCAGCGGGGATAAACCGCAGCTCCCATTTTCAAACCCATCAAGA  
CGCGGTACCTTAATTA

*Template CRISPR (T<sub>4</sub>), pWUR490*

GGCGCGCCATGGAAACAAAGAATTAGCTGATCTTTAATAATAAGGAAATGTTACATTAAGGTTGGTGGGTTGTTT  
TTATGGGAAAAAATGCTTTAAGAACAAATGTATACTTTTAGAGAGTTCCCCGCGCCAGCGGGGATAAACCGCTTT  
CGCAGACGCGCGGCGATACGCTCACGCAGAGTTCCCCGCGCCAGCGGGGATAAACCGCAGCCGAAGCCAAAGAAT



TCGCCGAACACGCTGAGTTCCCCGCGCCAGCGGGGATAAACCGGGCTCCCTGTCGGTTGTAATTGATAATGTTGA  
GAGTTCCCCGCGCCAGCGGGGATAAACCGTTTGGATCGGGTCTGGATCCTCTGAGCGGTCGGAGTTCCCCGCGCC  
AGCGGGGATAAACCGCGAATCGCGCATACCCTGCGCGTTCGCCCTGGAGTTCCCCGCGCCAGCGGGGATAAAC  
GTCAGCTTTATAAATATGCATATACGGAACTAGAGTTCCCCGCGCCAGCGGGGATAAACCGTGACAAGTCCACG  
TATGACCCGACCGACGATAGAGTTCCCCGCGCCAGCGGGGATAAACCGCAGCTCCCATTTTCAAACCCATCAAGA  
CGCGGTACCTTAATTAA

**Table S1.** Overview of different Cas systems. This table focuses on a subset of the Cas proteins: well conserved Cas proteins (Cas1-4), and subunits of the *E. coli* K12 Cascade complex (CasA-E); for more extensive comparative analyses, see (S15, S16). *E. coli* strains discussed in this study are in bold.

| Cas protein <sup>a</sup>     | Family <sup>b</sup> |                   | Cas system (CASS) <sup>c</sup>              |                                     |                                       |                                         |                                               |                                      |                                            |                                        | Function predicted (p) <sup>a</sup> , or demonstrated experimentally (e) |
|------------------------------|---------------------|-------------------|---------------------------------------------|-------------------------------------|---------------------------------------|-----------------------------------------|-----------------------------------------------|--------------------------------------|--------------------------------------------|----------------------------------------|--------------------------------------------------------------------------|
|                              |                     |                   | none                                        | CASS1                               | CASS2                                 | CASS3                                   | CASS4                                         | CASS5                                | CASS6                                      | CASS7                                  |                                                                          |
|                              |                     | Species<br>Strain | <i>Escherichia coli</i><br><b>BL21(DE3)</b> | <i>Bacillus halodurans</i><br>C-125 | <i>Escherichia coli</i><br><b>K12</b> | <i>Escherichia coli</i><br><b>UTI89</b> | <i>Streptococcus thermophilus</i><br>CNRZ1066 | <i>Sulfolobus solfataricus</i><br>P2 | <i>Nitrosomonas europaea</i><br>ATCC 19718 | <i>Archaeoglobus fulgidus</i><br>VC-16 |                                                                          |
| Cas1                         | COG1518             |                   | -                                           | BH0341                              | b2755 (YgbT)                          | C0890                                   | str0658                                       | SSO1450                              | NE0111                                     | AF1878                                 | nuclease/integrase (p)                                                   |
| Cas2                         | COG1343             |                   | -                                           | BH0342                              | b2754 (YgbF)                          | C0891 <sup>f</sup>                      | str0659                                       | SSO8090                              | NE0112                                     | AF1876                                 | RNA endonuclease (e) (S17)                                               |
| Cas3                         | COG1203             |                   | -                                           | BH0336                              | b2761 (YgcB)                          | C0891 <sup>f</sup>                      | -                                             | SSO1440                              | -                                          | AF1874                                 | DEAD-box helicase, often fused to HD nuclease (p)                        |
| Cas4                         | COG1468             |                   | -                                           | BH0340                              | -                                     | -                                       | - <sup>d</sup>                                | SSO1451                              | -                                          | AF1877                                 | RecB-like nuclease (p), often has C-terminal Zn clusters                 |
| Cascade complex <sup>e</sup> |                     |                   |                                             |                                     |                                       |                                         |                                               |                                      |                                            |                                        |                                                                          |
| CasA (Cse1)                  | YgcL                |                   | -                                           | -                                   | b2760 (YgcL)                          | -                                       | -                                             | -                                    | -                                          | -                                      | Zn-finger containing protein (p)                                         |
| CasB (cse2)                  | YgcK                |                   | -                                           | -                                   | b2759 (YgcK)                          | -                                       | -                                             | -                                    | -                                          | -                                      | α-helical protein (p)                                                    |
| CasC (Cse4)                  | YgcJ (COG1857)      |                   | -                                           | BH0339 (COG3649)                    | b2758 (YgcJ)                          | C0893 (y1725)                           | -                                             | SSO1442                              | -                                          | AF1871                                 | α/β protein, nuclease (p)                                                |
| CasD (Cas5/5e)               | YgcI (COG1688)      |                   | -                                           | BH0337                              | b2757 (YgcI)                          | C0893/894 (y1726)                       | -                                             | SSO1441                              | -                                          | AF1872                                 | RAMP (p)                                                                 |
| CasE (Cse3)                  | YgcH                |                   | -                                           | -                                   | b2756 (YgcH)                          | C0896 (y1727)                           | -                                             | -                                    | -                                          | -                                      | RAMP (p), crRNA endonuclease (e) <sup>e</sup>                            |

<sup>a</sup> Cas protein nomenclature and functional prediction according to (S15, S16, S18)

<sup>b</sup> Family nomenclature according to (S16), family may contain several COGs

<sup>c</sup> CASS nomenclature according to (S16)

<sup>d</sup> Cas4 is absent in CASS4 (*S. thermophilus*), but is present in CASS4a (S16)

<sup>e</sup> this study

<sup>f</sup> Fusion of Cas2 and Cas3

**Table S2**

Strains, plasmids and primers used in this study.

| Strains                                | Description                                                                                                                                                                                        | Source, reference   |
|----------------------------------------|----------------------------------------------------------------------------------------------------------------------------------------------------------------------------------------------------|---------------------|
| <i>Escherichia coli</i> K12 W3110      | BW25113, F <sup>+</sup> λ <sup>-</sup> rph-1 INV(rrnD, rrnE)                                                                                                                                       | (S1)                |
| <i>E. coli</i> K12 W3110 Δ <i>casA</i> | JW2730                                                                                                                                                                                             | (S19)               |
| <i>E. coli</i> K12 W3110 Δ <i>casB</i> | JW2729                                                                                                                                                                                             | (S19)               |
| <i>E. coli</i> K12 W3110 Δ <i>casC</i> | JW2728                                                                                                                                                                                             | (S19)               |
| <i>E. coli</i> K12 W3110 Δ <i>casD</i> | JW5844                                                                                                                                                                                             | (S19)               |
| <i>E. coli</i> K12 W3110 Δ <i>casE</i> | JW2726                                                                                                                                                                                             | (S19)               |
| <i>E. coli</i> K12 W3110 Δ <i>uidA</i> | JW1609, β-glucuronidase knockout                                                                                                                                                                   | (S19)               |
| <i>E. coli</i> BL21(DE3)               | F <sup>+</sup> ompT gal dcm lon hsdS <sub>B</sub> (r <sub>B</sub> <sup>-</sup> m <sub>B</sub> <sup>-</sup> ) λ(DE3 [lacI lacUV5-T7 gene 1 ind1 sam7 nin5])                                         | Novagen             |
| <i>E. coli</i> BL21-AI                 | F <sup>+</sup> ompT gal dcm lon hsdS <sub>B</sub> (r <sub>B</sub> <sup>-</sup> m <sub>B</sub> <sup>-</sup> ) araB::T7RNAP-tetA                                                                     | Novagen             |
| <i>E. coli</i> HB101                   | F <sup>+</sup> mcrB mrr hsdS20(r <sub>B</sub> <sup>-</sup> m <sub>B</sub> <sup>-</sup> ) recA13 leuB6 ara-14 proA2 lacY1 galK2 xyl-5 mtl-1 rpsL20(Sm <sup>R</sup> ) glnV44 λ <sup>-</sup>          | (S20)               |
| <i>E. coli</i> DH5α                    | F <sup>+</sup> endA1 glnV44 thi-1 recA1 relA1 gyrA96 deoR nupG Φ80d <i>lacZ</i> ΔM15 Δ( <i>lacZYA-argF</i> )U169, hsdR17(r <sub>K</sub> <sup>-</sup> m <sub>K</sub> <sup>-</sup> ), λ <sup>-</sup> |                     |
| <i>E. coli</i> NEB5α                   | fluA2 Δ(argF- <i>lacZ</i> )U169 phoA glnV44 Φ80Δ ( <i>lacZ</i> )M15 gyrA96 recA1 relA1 endA1 thi-1 hsdR17                                                                                          | New England Biolabs |

| Plasmids    | Description and order of genes (5'-3')                                                     | Restriction sites | Primers         | Source              |
|-------------|--------------------------------------------------------------------------------------------|-------------------|-----------------|---------------------|
| pET-52b(+)  | T7 RNA polymerase based expression vector, Amp <sup>R</sup>                                |                   |                 | Novagen             |
| pRSF-1b     | T7 RNA polymerase based expression vector, Kan <sup>R</sup>                                |                   |                 | Novagen             |
| pCDF-1b     | T7 RNA polymerase based expression vector, Str <sup>R</sup>                                |                   |                 | Novagen             |
| pACYCDuet-1 | T7 RNA polymerase based expression vector, Cam <sup>R</sup>                                |                   |                 | Novagen             |
| pZEo-1.1    | Cloning plasmid, Zeo <sup>R</sup>                                                          |                   |                 | Invitrogen          |
| pIH1119     | Expression vector for N-terminal MalE fusion proteins, Amp <sup>R</sup>                    |                   |                 | New England Biolabs |
| pWUR384     | <i>casE</i> in pET-52b with both StrepII- tag (N-term) and His <sub>10</sub> -tag (C-term) | BamHI/NotI        | BG2253 + BG2254 | This study          |
| pWUR385     | <i>casD</i> in pET-52b with both StrepII- tag (N-term) and His <sub>10</sub> -tag (C-term) | KpnI/NotI         | BG2316 + BG2252 | This study          |
| pWUR386     | <i>casC</i> in pET-52b with both StrepII- tag (N-term) and His <sub>10</sub> -tag (C-term) | BamHI/NotI        | BG2249 + BG2250 | This study          |
| pWUR387     | <i>casB</i> in pET-52b with both StrepII- tag (N-term) and His <sub>10</sub> -tag (C-term) | BamHI/NotI        | BG2245 + BG2246 | This study          |
| pWUR388     | <i>casA</i> in pET-52b with both StrepII- tag (N-term) and His <sub>10</sub> -tag (C-term) | Acc65I/NotI       | BG2247 + BG2248 | This study          |
| pWUR396     | <i>E. coli</i> K12 CRISPR in pACYCDuet-1                                                   | NcoI/Acc65I       | BG2459 + BG2460 | This study          |
| pWUR397     | <i>cas3</i> in pRSF-1b, no tags                                                            | NcoI/NotI         | BG2371 + BG2372 | This study          |
| pWUR399     | <i>casA-casB-casC-casD-casE-cas1-cas2</i> in pCDF-1b, no tags                              | NcoI/NotI         | BG2394 + BG2375 | This study          |
| pWUR400     | <i>casA-casB-casC-casD-casE</i> in pCDF-1b, no tags                                        | NcoI/NotI         | BG2394 + BG2481 | This study          |
| pWUR401     | <i>casB-casC-casD-casE</i> in pCDF-1b, no tags                                             | NcoI/NotI         | BG2464 + BG2481 | This study          |
| pWUR402     | <i>casC-casD-casE</i> in pCDF-1b, no tags                                                  | NcoI/NotI         | BG2465 + BG2481 | This study          |
| pWUR403     | <i>casD-casE</i> in pCDF-1b, no tags                                                       | NcoI/NotI         | BG2466 + BG2481 | This study          |
| pWUR404     | <i>casE</i> in pCDF-1b, no tags                                                            | NcoI/NotI         | BG2480 + BG2481 | This study          |
| pWUR405     | <i>casA-casB-casC-casD</i> in pRSF-1b, no tags                                             | NcoI/NotI         | BG2394 + BG2482 | This study          |
| pWUR406     | <i>casA-casB-casC</i> in pRSF-1b, no tags                                                  | NcoI/NotI         | BG2394 + BG2483 | This study          |
| pWUR407     | <i>casA-casB</i> in pRSF-1b, no tags                                                       | NcoI/NotI         | BG2394 + BG2484 | This study          |
| pWUR408     | <i>casA</i> in pRSF-1b, no tags                                                            | NcoI/NotI         | BG2394 + BG2485 | This study          |
| pWUR472     | pWUR400 with H20A mutation in CasE                                                         |                   | BG2584 + BG2585 | This study          |
| pWUR473     | pWUR404 with H20A mutation in CasE                                                         |                   | BG2584 + BG2585 | This study          |
| pWUR477     | non targeting CRISPR in pACYCDuet-1 (N)                                                    |                   |                 | Geneart, Germany    |
| pWUR478     | template CRISPR in pACYCDuet-1 (T <sub>1-4</sub> )                                         |                   |                 | Geneart, Germany    |
| pWUR479     | coding CRISPR in pACYCDuet-1 (C <sub>1-4</sub> )                                           |                   |                 | Geneart, Germany    |
| pWUR480     | <i>casB</i> with StrepII-tag (N-term)- <i>casC-casD</i> in pET52b                          |                   | BG2573 + BG2482 | This study          |
| pWUR481     | <i>casE</i> in pIH1119 generating MalE-CasE fusion protein                                 |                   | BG2586 + BG2587 | This study          |
| pWUR487     | Template CRISPR (T <sub>1</sub> ), pWUR477 with template spacer 1, subcloned from pWUR 478 | NcoI/EcoRI        |                 | This study          |
| pWUR488     | Template CRISPR (T <sub>2</sub> ), pWUR477 with template spacer 2, subcloned from pWUR 478 | EcoRI/BamHI       |                 | This study          |
| pWUR489     | Template CRISPR (T <sub>3</sub> ), pWUR477 with template spacer 3, subcloned from pWUR 478 | BamHI/NsiI        |                 | This study          |
| pWUR490     | Template CRISPR (T <sub>4</sub> ), pWUR477 with template spacer 4, subcloned from pWUR 478 | NsiI/Acc65I       |                 | This study          |
| pWUR491     | Coding CRISPR (C <sub>1</sub> ), pWUR477 with coding spacer 1, subcloned from pWUR 479     | NcoI/EcoRI        |                 | This study          |
| pWUR492     | Coding CRISPR (C <sub>2</sub> ), pWUR477 with coding spacer 2, subcloned from pWUR 479     | EcoRI/BamHI       |                 | This study          |
| pWUR493     | Coding CRISPR (C <sub>3</sub> ), pWUR477 with coding spacer 3, subcloned from pWUR 479     | BamHI/NsiI        |                 | This study          |
| pWUR494     | Coding CRISPR (C <sub>4</sub> ), pWUR477 with coding spacer 4, subcloned from pWUR 479     | NsiI/Acc65I       |                 | This study          |

| Experiment           | Primer              | Sequence (5'-3')                             | Description                                          |                                                           |
|----------------------|---------------------|----------------------------------------------|------------------------------------------------------|-----------------------------------------------------------|
| Plasmid construction | BG2245              | GCGCGGGATCCATGGCTGATGAAATTGATGCAATG          | <i>casB</i> + BamHI (fw)                             |                                                           |
|                      | BG2246              | GGCCCGGGCCGCGCATTTTGTGTTGGTCAATAC            | <i>casB</i> + NotI (rv)                              |                                                           |
|                      | BG2247              | GCGCGGGTACCAGATGAATTGCTTATTGATAACTGGAT       | <i>casA</i> + Acc65I (fw)                            |                                                           |
|                      | BG2248              | GGCCCGGGCCGCGCCATTTGATGGCCCTCCTTG            | <i>casA</i> + NotI (rv)                              |                                                           |
|                      | BG2249              | GCGCGGGATCCATGTCCTAACTTTATCAATATTCATGT       | <i>casC</i> + BamHI (fw)                             |                                                           |
|                      | BG2250              | GGCCCGGGCCGCGCCTCGCCATTATTACGAAC             | <i>casC</i> + NotI (rv)                              |                                                           |
|                      | BG2316              | GCGCGGGTACCAGATGAGATCTTATTGATCTTGCGG         | <i>casD</i> + KpnI (fw)                              |                                                           |
|                      | BG2252              | GGCCCGGGCCGCGCTGAGATACATCCATACCTCCT          | <i>casD</i> + NotI (rv)                              |                                                           |
|                      | BG2253              | GCGCGGGATCCATGATCTCAGTAAAGTCATCATTG          | <i>casE</i> + BamHI (fw)                             |                                                           |
|                      | BG2254              | GGCCCGGGCCGCGCAGTGGAGCCAAAGATAGCAAG          | <i>casE</i> + NotI (rv)                              |                                                           |
|                      | BG2371              | GCGCGCCATGGAACTTTTAAATATATATGCCATTACT        | <i>cas3</i> + NcoI (fw)                              |                                                           |
|                      | BG2372              | GGCCCGGGCCGCGCTTATTTGGGATTTGCAGGGATGACT      | <i>cas3</i> + NotI + stopcodon (rv)                  |                                                           |
|                      | BG2375              | GGCCCGGGCCGCGCTCAAACAGGTAAAAAAGACACCAAC      | <i>cas2</i> + NotI + stopcodon (rv)                  |                                                           |
|                      | BG2394              | GCGCGCCATGGCTAATTTGCTTATTGATAACTGGATCC       | <i>casA</i> + NcoI (fw)                              |                                                           |
|                      | BG2459              | GCGTACCATGGCATAAGGAAATGTTACATTAAGGTTGG       | <i>E. coli</i> K12 CRISPR + NcoI (fw)                |                                                           |
|                      | BG2460              | GGTCCGGTACCAGCTCAGGCGTGAAATCTCAC             | <i>E. coli</i> K12 CRISPR + Acc65I (rv)              |                                                           |
|                      | BG2464              | GCGCGCCATGGCTATGGCTGATGAAATTGATGCAATG        | <i>casB</i> + NcoI (fw)                              |                                                           |
|                      | BG2465              | GCGCGCCATGGCTATGCTAACTTTATCAATATTCATGT       | <i>casC</i> + NcoI (fw)                              |                                                           |
|                      | BG2466              | GCGCGCCATGGCTATGAGATCTTATTGATCTTGCGG         | <i>casD</i> + NcoI (fw)                              |                                                           |
|                      | BG2480              | GCGCGCCATGGCTATGATCTCAGTAAAGTCATCATTG        | <i>casE</i> + NcoI (fw)                              |                                                           |
|                      | BG2481              | GGCCCGGGCCGCGCTCACAGTGGAGCCAAAGATAGC         | <i>casE</i> + NotI + stopcodon (rv)                  |                                                           |
|                      | BG2482              | GGCCCGGGCCGCGCTTACTGAGATACATCCATACCTCC       | <i>casD</i> + NotI + stopcodon (rv)                  |                                                           |
|                      | BG2483              | GGCCCGGGCCGCGCTCAGCCTCGCCATTATTACGA          | <i>casC</i> + NotI + stopcodon (rv)                  |                                                           |
|                      | BG2484              | GGCCCGGGCCGCGCTTACGCATTTTGTGTTGGTCAAT        | <i>casB</i> + NotI + stopcodon (rv)                  |                                                           |
|                      | BG2485              | GGCCCGGGCCGCGCTCAGCCATTTGATGGCCCTCC          | <i>casA</i> + NotI + stopcodon (rv)                  |                                                           |
|                      | BG2573              | GCGCGGGTACCAGATGGCTGATGAAATTGATGCAATG        | <i>casB</i> + Acc65I (fw)                            |                                                           |
|                      | BG2586              | GGCCCGGGCCGCGCTGCAAGTACAGTGGAGCCAAAGATAGCAAG | <i>casE</i> + NotI + PstI + stopcodon (rv)           |                                                           |
|                      | BG2587              | GCGCGAATTCATGTATCTCAGTAAAGTCATCATTG          | <i>casE</i> + EcoRI (fw)                             |                                                           |
|                      | QuikChange mutation | BG2584                                       | GAGCAGGGATCTTTACCACTTGCAGGGATTATGGCATTTATTCC         | QuikChange primer <i>casE</i> H20A (fw)                   |
|                      |                     | BG2585                                       | GGAAATAAATGCCATAATCCCTGCGCAAGTTGGTAAAGATCCCTGCTC     | QuikChange primer <i>casE</i> H20A (rv)                   |
|                      | Cleavage reaction   | BG2559                                       | CTGACTTAATACGACTCACTATAGGATAAACCGCTTTCGACAGCGCGGCGGA | T7 promoter + <i>E. coli</i> K12 CRISPR transcript (fw)   |
|                      |                     | BG2374                                       | GGCCCGGGCCGCGCAGCGTCAAGCGTGAATCTC                    | <i>E. coli</i> K12 CRISPR transcript (rv)                 |
|                      |                     | BG2462                                       | CTGACTTAATACGACTCACTATAGGGAGGATAAAAAAGGGTGGCAGCAG    | T7 promoter + <i>E. coli</i> UT189 CRISPR transcript (fw) |
| BG2463               |                     | GGTGCACCTTCAACGTTCCAG                        | <i>E. coli</i> UT189 CRISPR transcript (rv)          |                                                           |
| BG2452               |                     | GAATTGTAATACGACTCACTATAGG                    | T7 promoter + non-CRISPR transcript pZErO-1.1 (fw)   |                                                           |
| BG2461               |                     | CTGAGATACCTACAGCGTGAGC                       | pZErO-1.1 non-CRISPR transcript (rv)                 |                                                           |
| Northern blot        | BG2349              | AGCTTGCAGCCGCTCAGAAAATCCAGACCCGATCCAAAG      | <i>E. coli</i> K12 CRISPR spacer 4 (rv)              |                                                           |
| RNA cloning          | BG2164              | GCCCGCCGGATCCCTTTTTTTTTTTTTTTTTTTTTTTTTTTVN  | Reverse transcription primer                         |                                                           |
|                      | BG2220              | GCGCCCGGGATCCCGCCCGCCDN                      | cDNA amplification + BamHI (fw)                      |                                                           |
|                      | BG2222              | GCCCGCCGGATCCCT                              | cDNA amplification + BamHI (rv)                      |                                                           |

**Table S3**

Extended legend presenting strains and plasmids used in each figure. Plasmid number and corresponding products are depicted in same color in each row. For strains, plasmids and primers see Table S2.

| Fig.                            | manuscript legend                                                                                                                                                                                                                                                                                                                                                                                                                                                                                                                                                                                                     | lane(s)                                                | strain                                                       | plasmids (pWUR-)                                                                                    | comments                                                                                                                                   |                        |                 |                                   |
|---------------------------------|-----------------------------------------------------------------------------------------------------------------------------------------------------------------------------------------------------------------------------------------------------------------------------------------------------------------------------------------------------------------------------------------------------------------------------------------------------------------------------------------------------------------------------------------------------------------------------------------------------------------------|--------------------------------------------------------|--------------------------------------------------------------|-----------------------------------------------------------------------------------------------------|--------------------------------------------------------------------------------------------------------------------------------------------|------------------------|-----------------|-----------------------------------|
| 1                               | The composition of the Cascade complex.                                                                                                                                                                                                                                                                                                                                                                                                                                                                                                                                                                               |                                                        |                                                              |                                                                                                     |                                                                                                                                            |                        |                 |                                   |
| 1B                              | Coomassie Blue stained SDS-PAGE gel of the affinity purified protein complex using either the amino-terminal StrepII-tag (S) or carboxy-terminal His-tag (H) of each of the subunits CasB, CasC, CasD or CasE as bait. Asterisks indicate the 5.5 kDa heavier double-tagged subunits. Marker sizes in kDa on the left, and the location of untagged subunits on the right.                                                                                                                                                                                                                                            | 1                                                      | <i>E. coli</i> BL21(DE3), for protein overproduction         | 387 + 399 + 397                                                                                     | CasB with both StrepII-tag (N-term) and His <sub>10</sub> -tag (C-term) + CasABCDE/Cas1/Cas2 + Cas3                                        |                        |                 |                                   |
|                                 |                                                                                                                                                                                                                                                                                                                                                                                                                                                                                                                                                                                                                       | 2                                                      |                                                              | 386 + 399 + 397                                                                                     | CasC with both StrepII-tag (N-term) and His <sub>10</sub> -tag (C-term) + CasABCDE/Cas1/Cas2 + Cas3                                        |                        |                 |                                   |
|                                 |                                                                                                                                                                                                                                                                                                                                                                                                                                                                                                                                                                                                                       | 3                                                      |                                                              | 385 + 399 + 397                                                                                     | CasD with both StrepII-tag (N-term) and His <sub>10</sub> -tag (C-term) + CasABCDE/Cas1/Cas2 + Cas3                                        |                        |                 |                                   |
|                                 |                                                                                                                                                                                                                                                                                                                                                                                                                                                                                                                                                                                                                       | 4                                                      |                                                              | 384 + 399 + 397                                                                                     | CasE with both StrepII-tag (N-term) and His <sub>10</sub> -tag (C-term) + CasABCDE/Cas1/Cas2 + Cas3                                        |                        |                 |                                   |
|                                 |                                                                                                                                                                                                                                                                                                                                                                                                                                                                                                                                                                                                                       | 5                                                      |                                                              |                                                                                                     |                                                                                                                                            |                        |                 |                                   |
|                                 |                                                                                                                                                                                                                                                                                                                                                                                                                                                                                                                                                                                                                       | 6                                                      |                                                              |                                                                                                     |                                                                                                                                            |                        |                 |                                   |
|                                 |                                                                                                                                                                                                                                                                                                                                                                                                                                                                                                                                                                                                                       | 7                                                      |                                                              |                                                                                                     |                                                                                                                                            |                        |                 |                                   |
|                                 |                                                                                                                                                                                                                                                                                                                                                                                                                                                                                                                                                                                                                       | 8                                                      |                                                              |                                                                                                     |                                                                                                                                            |                        |                 |                                   |
| 2                               | Cascade cleaves CRISPR RNA precursors into small RNAs of 57 nucleotides (←).                                                                                                                                                                                                                                                                                                                                                                                                                                                                                                                                          |                                                        |                                                              |                                                                                                     |                                                                                                                                            |                        |                 |                                   |
| 2A                              | Northern analysis of total RNA of wild type <i>E. coli</i> K12 (WT), a non- <i>cas</i> gene knockout ( <i>Δtu</i> , <i>uidA</i> , β-glucuronidase) and Cascade gene-knockouts using a single stranded spacer sequence as a probe.                                                                                                                                                                                                                                                                                                                                                                                     | WT                                                     | <i>E. coli</i> K12 W3110                                     |                                                                                                     |                                                                                                                                            |                        |                 |                                   |
|                                 |                                                                                                                                                                                                                                                                                                                                                                                                                                                                                                                                                                                                                       | <i>ΔuidA</i>                                           | <i>E. coli</i> K12 W3110 <i>ΔuidA</i>                        |                                                                                                     |                                                                                                                                            |                        |                 |                                   |
|                                 |                                                                                                                                                                                                                                                                                                                                                                                                                                                                                                                                                                                                                       | <i>ΔcasA</i>                                           | <i>E. coli</i> K12 W3110 <i>ΔcasA</i>                        |                                                                                                     |                                                                                                                                            |                        |                 |                                   |
|                                 |                                                                                                                                                                                                                                                                                                                                                                                                                                                                                                                                                                                                                       | <i>ΔcasB</i>                                           | <i>E. coli</i> K12 W3110 <i>ΔcasB</i>                        |                                                                                                     |                                                                                                                                            |                        |                 |                                   |
|                                 |                                                                                                                                                                                                                                                                                                                                                                                                                                                                                                                                                                                                                       | <i>ΔcasC</i>                                           | <i>E. coli</i> K12 W3110 <i>ΔcasC</i>                        |                                                                                                     |                                                                                                                                            |                        |                 |                                   |
|                                 |                                                                                                                                                                                                                                                                                                                                                                                                                                                                                                                                                                                                                       | <i>ΔcasD</i>                                           | <i>E. coli</i> K12 W3110 <i>ΔcasD</i>                        |                                                                                                     |                                                                                                                                            |                        |                 |                                   |
|                                 |                                                                                                                                                                                                                                                                                                                                                                                                                                                                                                                                                                                                                       | <i>ΔcasE</i>                                           | <i>E. coli</i> K12 W3110 <i>ΔcasE</i>                        |                                                                                                     |                                                                                                                                            |                        |                 |                                   |
| 2B                              | Northern blot of total RNA from <i>E. coli</i> BL21(DE3) expressing the <i>E. coli</i> K12 pre-crRNA and either the complete or incomplete Cascade complex.                                                                                                                                                                                                                                                                                                                                                                                                                                                           | 1                                                      | <i>E. coli</i> BL21(DE3)                                     | 396                                                                                                 | <i>E. coli</i> K12 CRISPR                                                                                                                  |                        |                 |                                   |
|                                 |                                                                                                                                                                                                                                                                                                                                                                                                                                                                                                                                                                                                                       | 2                                                      |                                                              | 400 + 396                                                                                           | CasABCDE + <i>E. coli</i> K12 CRISPR                                                                                                       |                        |                 |                                   |
|                                 |                                                                                                                                                                                                                                                                                                                                                                                                                                                                                                                                                                                                                       | 3                                                      |                                                              | 401 + 396                                                                                           | CasBCDE + <i>E. coli</i> K12 CRISPR                                                                                                        |                        |                 |                                   |
|                                 |                                                                                                                                                                                                                                                                                                                                                                                                                                                                                                                                                                                                                       | 4                                                      |                                                              | 408 + 402 + 396                                                                                     | CasA + CasCDE + <i>E. coli</i> K12 CRISPR                                                                                                  |                        |                 |                                   |
|                                 |                                                                                                                                                                                                                                                                                                                                                                                                                                                                                                                                                                                                                       | 5                                                      |                                                              | 407 + 403 + 396                                                                                     | CasAB + CasDE + <i>E. coli</i> K12 CRISPR                                                                                                  |                        |                 |                                   |
|                                 |                                                                                                                                                                                                                                                                                                                                                                                                                                                                                                                                                                                                                       | 6                                                      |                                                              | 406 + 404 + 396                                                                                     | CasABC + CasE + <i>E. coli</i> K12 CRISPR                                                                                                  |                        |                 |                                   |
|                                 |                                                                                                                                                                                                                                                                                                                                                                                                                                                                                                                                                                                                                       | 7                                                      |                                                              | 405 + 396                                                                                           | CasABCD + <i>E. coli</i> K12 CRISPR                                                                                                        |                        |                 |                                   |
| 2C                              | Activity assays with purified Cascade using <i>in vitro</i> transcribed α- <sup>32</sup> P-UTP labeled pre-crRNA from <i>E. coli</i> K12 (repeat sequence: GAGUCCCCGCCAGCGGGGAUAAACCG) and <i>E. coli</i> UT189 (repeat sequence: GUUCACUGCCGUACAGGCAGCUUAGAAA) and non-crRNA as substrates.                                                                                                                                                                                                                                                                                                                          | 1, 4, 7                                                | <i>E. coli</i> BL21(DE3), for protein overproduction         | 400 + 386                                                                                           | CasABCDE + CasC with StrepII-tag (N-term) and His <sub>10</sub> -tag (C-term), purified using StrepII-tag                                  |                        |                 |                                   |
|                                 |                                                                                                                                                                                                                                                                                                                                                                                                                                                                                                                                                                                                                       | 2, 5, 8                                                |                                                              |                                                                                                     |                                                                                                                                            |                        |                 |                                   |
|                                 |                                                                                                                                                                                                                                                                                                                                                                                                                                                                                                                                                                                                                       | 3, 6, 9                                                |                                                              |                                                                                                     |                                                                                                                                            |                        |                 |                                   |
| 2D                              | Activity assays as in 2C for 15 min using purified MalE-LacZa and MalE-CasE fusion proteins.                                                                                                                                                                                                                                                                                                                                                                                                                                                                                                                          | 1, 4, 7                                                | <i>E. coli</i> DH5a, for protein overproduction              | pIH119                                                                                              | control lanes without protein                                                                                                              |                        |                 |                                   |
|                                 |                                                                                                                                                                                                                                                                                                                                                                                                                                                                                                                                                                                                                       | 2, 5, 8                                                |                                                              | 481                                                                                                 | purified MalE-LacZa                                                                                                                        |                        |                 |                                   |
|                                 |                                                                                                                                                                                                                                                                                                                                                                                                                                                                                                                                                                                                                       | 3, 6, 9                                                |                                                              |                                                                                                     | purified MalE-CasE                                                                                                                         |                        |                 |                                   |
| 2E                              | Northern blot as in 2B with Cascade or Cascade-CasE <sup>H20A</sup> .                                                                                                                                                                                                                                                                                                                                                                                                                                                                                                                                                 | 1                                                      | <i>E. coli</i> BL21(DE3)                                     | 396                                                                                                 | <i>E. coli</i> K12 CRISPR                                                                                                                  |                        |                 |                                   |
|                                 |                                                                                                                                                                                                                                                                                                                                                                                                                                                                                                                                                                                                                       | 2                                                      |                                                              | 400 + 396                                                                                           | CasABCDE + <i>E. coli</i> K12 CRISPR                                                                                                       |                        |                 |                                   |
|                                 |                                                                                                                                                                                                                                                                                                                                                                                                                                                                                                                                                                                                                       | 3                                                      |                                                              | 472 + 396                                                                                           | CasABCDE with H20A mutation in CasE + <i>E. coli</i> K12 CRISPR                                                                            |                        |                 |                                   |
| 2F                              | Activity assays as in 2C for 30 min using purified Cascade or Cascade-CasE <sup>H20A</sup> .                                                                                                                                                                                                                                                                                                                                                                                                                                                                                                                          | 1                                                      | <i>E. coli</i> BL21(DE3), for overproduction of protein      |                                                                                                     | control lane without protein                                                                                                               |                        |                 |                                   |
|                                 |                                                                                                                                                                                                                                                                                                                                                                                                                                                                                                                                                                                                                       | 2                                                      |                                                              | 408 + 480 + 404                                                                                     | CasA + CasB with StrepII-tag (N-term)/CasCD + CasE, purified using StrepII-tag                                                             |                        |                 |                                   |
|                                 |                                                                                                                                                                                                                                                                                                                                                                                                                                                                                                                                                                                                                       | 3                                                      |                                                              | 408 + 480 + 473                                                                                     | CasA + CasB with StrepII-tag (N-term)/CasCD + CasE with H20A mutation, purified using StrepII-tag                                          |                        |                 |                                   |
| 3                               | Cleaved crRNAs remain bound by Cascade.                                                                                                                                                                                                                                                                                                                                                                                                                                                                                                                                                                               |                                                        |                                                              |                                                                                                     |                                                                                                                                            |                        |                 |                                   |
| 3A                              | Denaturing polyacrylamide gel showing the RNA isolated from purified Cascade in the absence and presence of co-expressed pre-crRNA.                                                                                                                                                                                                                                                                                                                                                                                                                                                                                   | 1                                                      | <i>E. coli</i> BL21(DE3), for protein and RNA overproduction | 387 + 400                                                                                           | CasB with both StrepII-tag (N-term) and His <sub>10</sub> -tag (C-term) + CasABCDE, purified using StrepII-tag                             |                        |                 |                                   |
|                                 |                                                                                                                                                                                                                                                                                                                                                                                                                                                                                                                                                                                                                       | 2                                                      |                                                              | 387 + 400 + 396                                                                                     | CasB with both StrepII-tag (N-term) and His <sub>10</sub> -tag (C-term) + CasABCDE + <i>E. coli</i> K12 CRISPR, purified using StrepII-tag |                        |                 |                                   |
| 4                               | Engineered CRISPRs confer resistance to phage Lambda (λ) in the presence of Cascade and Cas3.                                                                                                                                                                                                                                                                                                                                                                                                                                                                                                                         |                                                        |                                                              |                                                                                                     |                                                                                                                                            |                        |                 |                                   |
| 4A                              | Effect of the presence of different sets of cas genes on the sensitivity of <i>E. coli</i> to phage λ <sub>vir</sub> . Cells were equipped with two engineered CRISPRs containing four anti-λ spacers each (Fig.S3). The C <sub>1-4</sub> CRISPR produces crRNA complementary to the coding strand of λ <sub>vir</sub> , and the T <sub>1-4</sub> CRISPR targets only the template strand. The sensitivity of each strain to phage λ <sub>vir</sub> is represented as a histogram of the efficiency of plating, which is the plaque count ratio of the anti-λ CRISPR to that of the non-targeting control CRISPR (N). | Cascade + C <sub>1-4</sub>                             | <i>E. coli</i> BL21-AI                                       | 400 + 479                                                                                           | CasABCDE + coding spacer 1-4                                                                                                               |                        |                 |                                   |
|                                 |                                                                                                                                                                                                                                                                                                                                                                                                                                                                                                                                                                                                                       | Cascade + T <sub>1-4</sub>                             |                                                              | 400 + 478                                                                                           | CasABCDE + template spacer 1-4                                                                                                             |                        |                 |                                   |
|                                 |                                                                                                                                                                                                                                                                                                                                                                                                                                                                                                                                                                                                                       | Cas3 + C <sub>1-4</sub>                                |                                                              | 397 + 479                                                                                           | Cas3 + coding spacer 1-4                                                                                                                   |                        |                 |                                   |
|                                 |                                                                                                                                                                                                                                                                                                                                                                                                                                                                                                                                                                                                                       | Cas3 + T <sub>1-4</sub>                                |                                                              | 397 + 478                                                                                           | Cas3 + template spacer 1-4                                                                                                                 |                        |                 |                                   |
|                                 |                                                                                                                                                                                                                                                                                                                                                                                                                                                                                                                                                                                                                       | Cascade + Cas3 + C <sub>1-4</sub>                      |                                                              | 400 + 397 + 479                                                                                     | CasABCDE + Cas3 + coding spacer 1-4                                                                                                        |                        |                 |                                   |
|                                 |                                                                                                                                                                                                                                                                                                                                                                                                                                                                                                                                                                                                                       | Cascade + Cas3 + T <sub>1-4</sub>                      |                                                              | 400 + 397 + 478                                                                                     | CasABCDE + Cas3 + template spacer 1-4                                                                                                      |                        |                 |                                   |
|                                 |                                                                                                                                                                                                                                                                                                                                                                                                                                                                                                                                                                                                                       | Cascade-CasE <sup>H20A</sup> + Cas3 + C <sub>1-4</sub> |                                                              | 472 + 397 + 479                                                                                     | CasABCDE with H20A mutation in CasE + Cas3 + coding spacer 1-4                                                                             |                        |                 |                                   |
|                                 |                                                                                                                                                                                                                                                                                                                                                                                                                                                                                                                                                                                                                       | Cascade-CasE <sup>H20A</sup> + Cas3 + T <sub>1-4</sub> |                                                              | 472 + 397 + 478                                                                                     | CasABCDE with H20A mutation in CasE + Cas3 + template spacer 1-4                                                                           |                        |                 |                                   |
|                                 |                                                                                                                                                                                                                                                                                                                                                                                                                                                                                                                                                                                                                       | Cascade + Cas1 + Cas2 + C <sub>1-4</sub>               |                                                              | 399 + 479                                                                                           | CasABCDE/Cas1/Cas2 + coding spacer 1-4                                                                                                     |                        |                 |                                   |
|                                 |                                                                                                                                                                                                                                                                                                                                                                                                                                                                                                                                                                                                                       | Cascade + Cas1 + Cas2 + T <sub>1-4</sub>               |                                                              | 399 + 478                                                                                           | CasABCDE/Cas1/Cas2 + template spacer 1-4                                                                                                   |                        |                 |                                   |
|                                 |                                                                                                                                                                                                                                                                                                                                                                                                                                                                                                                                                                                                                       | Cascade + Cas3 + Cas1 + Cas2 + C <sub>1-4</sub>        |                                                              | 399 + 397 + 479                                                                                     | CasABCDE/Cas1/Cas2 + Cas3 + coding spacer 1-4                                                                                              |                        |                 |                                   |
|                                 |                                                                                                                                                                                                                                                                                                                                                                                                                                                                                                                                                                                                                       | Cascade + Cas3 + Cas1 + Cas2 + T <sub>1-4</sub>        |                                                              | 399 + 397 + 478                                                                                     | CasABCDE/Cas1/Cas2 + Cas3 + template spacer 1-4                                                                                            |                        |                 |                                   |
|                                 |                                                                                                                                                                                                                                                                                                                                                                                                                                                                                                                                                                                                                       | 4B                                                     |                                                              | Effect of single anti-λ spacers (Fig.S3) on the sensitivity of <i>E. coli</i> to λ <sub>vir</sub> . | Cascade + Cas3 + C <sub>1</sub>                                                                                                            | <i>E. coli</i> BL21-AI | 400 + 397 + 491 | CasABCDE + Cas3 + coding spacer 1 |
|                                 |                                                                                                                                                                                                                                                                                                                                                                                                                                                                                                                                                                                                                       |                                                        |                                                              |                                                                                                     | Cascade + Cas3 + C <sub>2</sub>                                                                                                            |                        | 400 + 397 + 492 | CasABCDE + Cas3 + coding spacer 2 |
| Cascade + Cas3 + C <sub>3</sub> | 400 + 397 + 493                                                                                                                                                                                                                                                                                                                                                                                                                                                                                                                                                                                                       |                                                        | CasABCDE + Cas3 + coding spacer 3                            |                                                                                                     |                                                                                                                                            |                        |                 |                                   |
| Cascade + Cas3 + C <sub>4</sub> | 400 + 397 + 494                                                                                                                                                                                                                                                                                                                                                                                                                                                                                                                                                                                                       |                                                        | CasABCDE + Cas3 + coding spacer 4                            |                                                                                                     |                                                                                                                                            |                        |                 |                                   |
| Cascade + Cas3 + T <sub>1</sub> | 400 + 397 + 487                                                                                                                                                                                                                                                                                                                                                                                                                                                                                                                                                                                                       |                                                        | CasABCDE + Cas3 + template spacer 1                          |                                                                                                     |                                                                                                                                            |                        |                 |                                   |
| Cascade + Cas3 + T <sub>2</sub> | 400 + 397 + 488                                                                                                                                                                                                                                                                                                                                                                                                                                                                                                                                                                                                       |                                                        | CasABCDE + Cas3 + template spacer 2                          |                                                                                                     |                                                                                                                                            |                        |                 |                                   |
| Cascade + Cas3 + T <sub>3</sub> | 400 + 397 + 489                                                                                                                                                                                                                                                                                                                                                                                                                                                                                                                                                                                                       |                                                        | CasABCDE + Cas3 + template spacer 3                          |                                                                                                     |                                                                                                                                            |                        |                 |                                   |
| Cascade + Cas3 + T <sub>4</sub> | 400 + 397 + 490                                                                                                                                                                                                                                                                                                                                                                                                                                                                                                                                                                                                       |                                                        | CasABCDE + Cas3 + template spacer 4                          |                                                                                                     |                                                                                                                                            |                        |                 |                                   |

## References

- S1. K. Hayashi *et al.*, *Mol. Syst. Biol.* 2, 2006 0007 (2006).
- S2. A. P. Snijders *et al.*, *Proteomics* 6, 1518 (2006).
- S3. J. Sambrook, E. F. Fritsch, T. Maniatis, *Molecular Cloning* (Cold Spring Harbor Laboratory Press, New York, ed. 2nd, 1989).
- S4. J. Locker, *Anal. Biochem.* 98, 358 (1979).
- S5. S. M. Elbashir, W. Lendeckel, T. Tuschl, *Genes Dev.* 15, 188 (2001).
- S6. L. M. Botero *et al.*, *Appl. Environ. Microbiol.* 71, 1267 (2005).
- S7. F. Jacob, E. L. Wollman, *Ann. Inst. Pasteur (Paris)* 87, 653 (1954).
- S8. R. Barrangou *et al.*, *Science* 315, 1709 (2007).
- S9. H. Deveau *et al.*, *J. Bacteriol.* 190, 1390 (2008).
- S10. P. Horvath *et al.*, *J. Bacteriol.* 190, 1401 (2008).
- S11. F. J. Mojica, C. Diez-Villasenor, J. Garcia-Martinez, E. Soria, *J. Mol. Evol.* 60, 174 (2005).
- S12. O. Poirot, E. O'Toole, C. Notredame, *Nucleic Acids Res.* 31, 3503 (2003).
- S13. A. Ebihara *et al.*, *Protein Sci.* 15, 1494 (2006).
- S14. P. Gouet, X. Robert, E. Courcelle, *Nucleic Acids Res.* 31, 3320 (2003).
- S15. D. H. Haft, J. Selengut, E. F. Mongodin, K. E. Nelson, *PLoS Comput. Biol.* 1, e60 (2005).
- S16. K. S. Makarova, N. V. Grishin, S. A. Shabalina, Y. I. Wolf, E. V. Koonin, *Biol. Direct* 1, 7 (2006).
- S17. N. Beloglazova *et al.*, *J. Biol. Chem.*, in press (available online at <http://www.jbc.org/cgi/content/abstract/M803225200v1>).
- S18. R. Jansen, J. D. Embden, W. Gaastra, L. M. Schouls, *Mol. Microbiol.* 43, 1565 (2002).
- S19. T. Baba, H. Mori, *Methods Mol. Biol.* 416, 171 (2008).
- S20. H. W. Boyer, R. Rouland-Dussoix, *J. Mol. Biol.* 41, 459 (1969).
